# Supplementary material for: Molecular and Serological Detection of Vector-Borne Pathogens Responsible for Equine Piroplasmosis in Europe between 2008 and 2021
Source: MDPI journal article supplement (doi:10.3390/microorganisms12040816), 2024-04-17
Supplement: s1 [file s1]

**Table S1.** Number of horses and percentages of horses tested positive for equine piroplasmosis by molecular and serological testing in the laboratory LABOKLIN from 2008 to 2021 (*n* tested positive / *N* total (% [95% CI lower limit;95% CI upper limit]))

| Year                       | Piroplasm-specific PCR           | <i>Babesia caballi</i> cELISA   | <i>Theileria equi</i> cELISA       |
|----------------------------|----------------------------------|---------------------------------|------------------------------------|
| 2008                       | 2/35 (5.7 [1.6;18.6])            | 12/34 (35.3 [21.5;52.1])        | 7/34 (20.6 [10.4;36.8])            |
| 2009                       | 1/25 (4.0 [0.7;19.5])            | 2/46 (4.3 [1.2;14.5])           | 8/46 (17.4 [9.1;30.7])             |
| 2010                       | 0/26 (0 [0;12.9])                | 2/59 (3.4 [0.9;11.5])           | 3/64 (4.7 [1.6;12.9])              |
| 2011                       | 0/20 (0 [0;16.1])                | 0/69 (0 [0;5.2])                | 6/69 (8.7 [4.0;17.7])              |
| 2012                       | 1/35 (2.9 [0.5;14.5])            | 1/94 (1.1 [0.2;5.8])            | 4/95 (4.2 [1.6;10.3])              |
| 2013                       | 3/62 (4.8 [1.7;13.3])            | 5/147 (3.4 [1.5;7.7])           | 18/147 (12.2 [7.9;18.5])           |
| 2014                       | 6/55 (10.9 [5.1;21.8])           | 8/104 (7.7 [3.9;14.5])          | 11/110 (10.0 [5.7;17.0])           |
| 2015                       | 21/151 (13.9 [9.3;20.3])         | 2/176 (1.1 [0.3;4.0])           | 9/176 (5.1 [2.7;9.4])              |
| 2016                       | 16/110 (14.5 [9.2;22.3])         | 7/173 (4.0 [2.0;8.1])           | 16/173 (9.2 [5.7;14.5])            |
| 2017                       | 10/155 (6.5 [3.5;11.5])          | 14/218 (6.4 [3.9;10.5])         | 31/219 (14.2 [10.2;19.4])          |
| 2018                       | 16/171 (9.4 [5.8;14.7])          | 12/255 (4.7 [2.7;8.0])          | 50/255 (19.6 [15.2;24.9])          |
| 2019                       | 20/201 (10.0 [6.5;14.9])         | 31/303 (10.2 [7.3;14.2])        | 60/303 (19.8 [15.7;24.7])          |
| 2020                       | 28/240 (11.7 [8.2;16.3])         | 22/307 (7.2 [4.8;10.6])         | 69/307 (22.5 [18.2;27.5])          |
| 2021                       | 30/303 (9.9 [7.0;13.8])          | 57/593 (9.6 [7.5;12.3])         | 101/593 (17.0 [14.2;20.3])         |
| <b>Total</b>               | <b>154/1589 (9.7 [8.3;11.3])</b> | <b>175/2578 (6.8 [5.9;7.8])</b> | <b>393/2591 (15.2 [13.8;16.6])</b> |
| <b>Fisher's exact test</b> | <b><i>P</i> = 0.119</b>          | <b><i>P</i> &lt; 0.001</b>      | <b><i>P</i> &lt; 0.001</b>         |

cELISA: competitive enzyme-linked immunosorbent assay; CI: confidence interval; PCR: polymerase chain reaction

**Table S2.** Number of horses and percentages of horses tested positive for equine piroplasmosis by molecular and serological testing in the laboratory LABOKLIN from 2008 to 2021 sorted by months of testing (*n* tested positive / *N* total (% [95% CI lower limit;95% CI upper limit]))

| Month                   | Piroplasm-specific PCR           | <i>Babesia caballi</i> cELISA   | <i>Theileria equi</i> cELISA       |
|-------------------------|----------------------------------|---------------------------------|------------------------------------|
| January                 | 8/98 (8.2 [3.6;15.5])            | 5/119 (4.2 [0.8;5.8])           | 15/119 (12.6 [7.2;19.9])           |
| February                | 8/112 (7.1 [3.1;13.6])           | 15/153 (9.8 [5.6;15.7])         | 28/153 (18.3 [12.5;25.4])          |
| March                   | 16/122 (13.1 [7.7;20.4])         | 13/154 (8.4 [4.6;14.0])         | 26/154 (16.9 [11.3;23.8])          |
| April                   | 8/111 (7.2 [3.2;13.7])           | 14/138 (10.1 [5.7;16.4])        | 19/139 (13.7 [8.4;20.5])           |
| May                     | 12/131 (10.7 [4.8;15.5])         | 13/198 (6.6 [3.5;11.0])         | 31/203 (15.3 [10.6;21.0])          |
| June                    | 23/187 (12.3 [8.0;17.9])         | 13/165 (8.4 [4.3;13.1])         | 26/165 (15.8 [10.6;22.2])          |
| July                    | 27/211 (12.8 [8.6;18.1])         | 10/227 (4.4 [2.1;8.0])          | 39/233 (16.7 [12.2;22.2])          |
| August                  | 8/127 (6.3 [2.8;12.0])           | 16/342 (4.7 [2.7;7.5])          | 38/342 (11.1 [8.0;14.9])           |
| September               | 9/130 (6.9 [3.2;12.7])           | 24/268 (9.0 [5.8;13.0])         | 52/268 (19.4 [14.8;24.7])          |
| October                 | 14/142 (9.9 [5.5;16.0])          | 22/275 (8.0 [5.1;11.9])         | 38/275 (13.8 [10.0;18.5])          |
| November                | 14/131 (10.7 [6.0;17.3])         | 22/306 (7.2 [4.6;10.7])         | 37/306 (12.1 [8.7;16.3])           |
| December                | 7/87 (8.0 [3.3;15.9])            | 8/233 (3.4 [1.5;6.7])           | 44/234 (18.8 [14.0;24.4])          |
| <b>Total</b>            | <b>154/1589 (9.7 [8.3;11.3])</b> | <b>175/2578 (6.8 [5.9;7.8])</b> | <b>393/2591 (15.2 [13.8;16.6])</b> |
| <b>Chi-squared test</b> | <b><i>P</i> = 0.481</b>          | <b><i>P</i> = 0.077</b>         | <b><i>P</i> = 0.141</b>            |

cELISA: competitive enzyme-linked immunosorbent assay; CI: confidence interval; PCR: polymerase chain reaction

**Table S3.** Multiple logistic regression analysis in 658 horses tested by piroplasm-specific PCR, in 1038 horses tested by *Babesia caballi* cELISA, and 1048 horses tested by *Theileria equi* cELISA from 2008 to 2021 in the laboratory LABOKLIN

|                                           | <i>B</i>     | <i>SE</i>    | Wald         | <i>P</i>     | Odds Ratio   | 95%-CI for Odds Ratio |              |
|-------------------------------------------|--------------|--------------|--------------|--------------|--------------|-----------------------|--------------|
|                                           |              |              |              |              |              | Lower bound           | Upper Bound  |
| Piroplasm-specific PCR ( <i>n</i> = 658)  |              |              |              |              |              |                       |              |
| Sex (male)                                | 0.372        | 0.311        | 1.431        | 0.232        | 1.451        | 0.789                 | 2.669        |
| Age (< 9 years)                           | <b>0.704</b> | <b>0.292</b> | <b>5.814</b> | <b>0.016</b> | <b>2.022</b> | <b>1.141</b>          | <b>3.584</b> |
| Years (years)                             | -0.052       | 0.076        | 0.476        | 0.490        | 0.949        | 0.818                 | 1.101        |
| Timeframe (2016-2022)                     | 0.810        | 0.607        | 1.778        | 0.182        | 2.247        | 0.683                 | 7.391        |
| Season (Spring/autumn)                    | 0.247        | 0.289        | 0.727        | 0.394        | 1.280        | 0.726                 | 2.256        |
| Babesia caballi cELISA ( <i>n</i> = 1038) |              |              |              |              |              |                       |              |
| Sex (male)                                | 0.380        | 0.290        | 1.717        | 0.190        | 1.462        | 0.828                 | 2.580        |
| Age (< 9 years)                           | 0.102        | 0.271        | 0.140        | 0.708        | 1.107        | 0.651                 | 1.882        |
| Years (years)                             | 0.044        | 0.075        | 0.334        | 0.564        | 1.045        | 0.901                 | 1.211        |
| Timeframe (2016-2022)                     | 0.849        | 0.623        | 1.856        | 0.173        | 2.338        | 0.689                 | 7.936        |
| Season (Spring/autumn)                    | -0.517       | 0.273        | 3.593        | 0.058        | 0.596        | 0.349                 | 1.018        |
| Theileria equi cELISA ( <i>n</i> = 1048)  |              |              |              |              |              |                       |              |
| Sex (male)                                | 0.299        | 0.197        | 2.309        | 0.129        | 1.348        | 0.917                 | 1.982        |
| Age (< 9 years)                           | 0.321        | 0.190        | 2.834        | 0.092        | 1.378        | 0.949                 | 2.001        |
| Years (years)                             | <b>0.146</b> | <b>0.054</b> | <b>7.327</b> | <b>0.007</b> | <b>1.157</b> | <b>1.041</b>          | <b>1.285</b> |
| Timeframe (2016-2022)                     | 0.129        | 0.419        | 0.094        | 0.759        | 1.137        | 0.500                 | 2.585        |
| Season (Spring/autumn)                    | 0.073        | 0.183        | 0.161        | 0.688        | 1.076        | 0.752                 | 1.539        |

B: unstandardized regression weight; cELISA: competitive enzyme-linked immunosorbent assay; CI: confidence interval; SE: standard deviation to the mean; PCR: polymerase chain reaction

Degrees of freedom were 1 for all Wald statistics
